# Supplementary material for: Online Information of COVID-19: Visibility and Characterization of Highest Positioned Websites by Google between March and April 2020—A Cross-Country Analysis
Source: MDPI journal article supplement (doi:10.3390/ijerph19031491), 2022-01-28
Supplement: s1 [file s1]

**Table S1.** Types of information from Google using the “COVID-19”, “Coronavirus” and “SARS-CoV-2” keywords, by country (n = 532)

|           |             | Type of information |                                |                                   |                                   |                            |                   |                |           |                     |                                                          |                                                  |                     |                    |                                            |                        |      | Was the information true or false according to scientific knowledge ? |                 | TOTAL SERP |
|-----------|-------------|---------------------|--------------------------------|-----------------------------------|-----------------------------------|----------------------------|-------------------|----------------|-----------|---------------------|----------------------------------------------------------|--------------------------------------------------|---------------------|--------------------|--------------------------------------------|------------------------|------|-----------------------------------------------------------------------|-----------------|------------|
|           |             | Quarantine          | Symptoms of disease /infection | Disease or infection risk factors | Disease or infection consequences | Ways of virus transmission | Incubation period | Carrying virus | Treatment | Preventive measures | Epidemiological data (number of infections, deaths etc.) | Contained a testimonial (e.g., a personal story) | Mentioned celebrity | Mentioned religion | Other: regulations, services, economy etc. | About online fake news | True | False                                                                 |                 |            |
|           |             |                     |                                |                                   |                                   |                            |                   |                |           |                     |                                                          |                                                  |                     |                    |                                            |                        |      |                                                                       |                 |            |
| Country   | "Keyword"   |                     |                                |                                   |                                   |                            |                   |                |           |                     |                                                          |                                                  |                     |                    |                                            |                        |      |                                                                       |                 |            |
| Spain     | COVID-19    | 3                   | 3                              | 3                                 | 3                                 | 4                          | 3                 | 2              | 2         | 2                   | 6                                                        | 0                                                | 0                   | 1                  | 16                                         | 1                      | 20   | 0                                                                     | 20              |            |
|           | Coronavirus | 7                   | 6                              | 7                                 | 4                                 | 5                          | 2                 | 3              | 4         | 7                   | 12                                                       | 0                                                | 4                   | 0                  | 14                                         | 1                      | 20   | 0                                                                     | 20              |            |
|           | SARS-CoV-2  | 3                   | 12                             | 15                                | 11                                | 15                         | 11                | 8              | 11        | 11                  | 7                                                        | 0                                                | 0                   | 0                  | 13                                         | 0                      | 20   | 0                                                                     | 20              |            |
|           | total       | 13                  | 21                             | 25                                | 18                                | 24                         | 16                | 13             | 17        | 20                  | 25                                                       | 0                                                | 4                   | 1                  | 43                                         | 2                      | 60   | 0                                                                     | 60              |            |
| Singapore | COVID-19    | 5                   | 1                              | 5                                 | 1                                 | 0                          | 0                 | 0              | 1         | 4                   | 8                                                        | 0                                                | 0                   | 0                  | 15                                         | 1                      | 21   | 0                                                                     | 21              |            |
|           | Coronavirus | 2                   | 2                              | 2                                 | 2                                 | 2                          | 1                 | 1              | 4         | 3                   | 11                                                       | 0                                                | 2                   | 0                  | 12                                         | 1                      | 20   | 0                                                                     | 20              |            |
|           | SARS-CoV-2  | 1                   | 3                              | 5                                 | 3                                 | 5                          | 9                 | 9              | 2         | 6                   | 7                                                        | 0                                                | 0                   | 0                  | 11                                         | 1                      | 20   | 0                                                                     | 20              |            |
|           | total       | 8                   | 6                              | 12                                | 6                                 | 7                          | 10                | 10             | 7         | 13                  | 26                                                       | 0                                                | 2                   | 0                  | 38                                         | 3                      | 61   | 0                                                                     | 61              |            |
| USA       | COVID-19    | 7                   | 11                             | 13                                | 9                                 | 11                         | 6                 | 4              | 5         | 11                  | 11                                                       | 0                                                | 1                   | 0                  | 17                                         | 0                      | 19   | 0                                                                     | 20 <sup>a</sup> |            |
|           | Coronavirus | 5                   | 8                              | 9                                 | 3                                 | 6                          | 3                 | 1              | 1         | 11                  | 7                                                        | 0                                                | 0                   | 0                  | 17                                         | 1                      | 20   | 0                                                                     | 20              |            |
|           | SARS-CoV-2  | 1                   | 7                              | 5                                 | 2                                 | 9                          | 8                 | 6              | 3         | 1                   | 7                                                        | 0                                                | 0                   | 0                  | 14                                         | 1                      | 20   | 0                                                                     | 20              |            |
|           | total       | 13                  | 26                             | 27                                | 14                                | 26                         | 17                | 11             | 9         | 23                  | 25                                                       | 0                                                | 1                   | 0                  | 48                                         | 2                      | 59   | 0                                                                     | 60              |            |
| Australia | COVID-19    | 0                   | 6                              | 3                                 | 0                                 | 0                          | 0                 | 1              | 1         | 8                   | 7                                                        | 0                                                | 0                   | 0                  | 15                                         | 0                      | 20   | 0                                                                     | 20              |            |
|           | Coronavirus | 1                   | 5                              | 6                                 | 1                                 | 0                          | 0                 | 0              | 1         | 10                  | 7                                                        | 3                                                | 1                   | 0                  | 14                                         | 0                      | 20   | 0                                                                     | 20              |            |
|           | SARS-CoV-2  | 0                   | 3                              | 2                                 | 1                                 | 3                          | 1                 | 2              | 0         | 7                   | 3                                                        | 0                                                | 0                   | 0                  | 11                                         | 0                      | 20   | 0                                                                     | 20              |            |

|         |             |     |     |     |     |     |     |     |     |     |     |    |    |    |     |    |      |    |      |
|---------|-------------|-----|-----|-----|-----|-----|-----|-----|-----|-----|-----|----|----|----|-----|----|------|----|------|
|         | total       | 1   | 14  | 11  | 2   | 3   | 1   | 3   | 2   | 25  | 17  | 3  | 1  | 0  | 40  | 0  | 60   | 0  | 60   |
| Poland  | COVID-19    | 1   | 9   | 8   | 6   | 9   | 0   | 5   | 2   | 6   | 9   | 1  | 0  | 0  | 9   | 0  | 20   | 0  | 20   |
|         | Coronavirus | 9   | 6   | 4   | 5   | 14  | 2   | 4   | 1   | 16  | 9   | 1  | 0  | 0  | 9   | 0  | 20   | 0  | 20   |
|         | SARS-CoV-2  | 2   | 12  | 3   | 1   | 8   | 3   | 3   | 1   | 8   | 5   | 0  | 0  | 0  | 2   | 2  | 20   | 0  | 20   |
|         | total       | 12  | 27  | 15  | 12  | 31  | 5   | 12  | 4   | 30  | 23  | 2  | 0  | 0  | 20  | 2  | 60   | 0  | 60   |
| UK      | COVID-19    | 5   | 7   | 6   | 2   | 7   | 3   | 2   | 8   | 6   | 7   | 0  | 0  | 1  | 5   | 0  | 19   | 0  | 19   |
|         | Coronavirus | 4   | 8   | 7   | 2   | 3   | 4   | 1   | 0   | 8   | 7   | 2  | 0  | 0  | 10  | 0  | 20   | 0  | 20   |
|         | SARS-CoV-2  | 3   | 6   | 6   | 0   | 3   | 0   | 1   | 1   | 2   | 3   | 0  | 0  | 0  | 1   | 0  | 12   | 0  | 12   |
|         | total       | 12  | 21  | 19  | 4   | 13  | 7   | 4   | 9   | 16  | 17  | 2  | 0  | 0  | 16  | 0  | 51   | 0  | 51   |
| Germany | COVID-19    | 0   | 13  | 7   | 7   | 8   | 1   | 0   | 2   | 8   | 7   | 2  | 0  | 0  | 11  | 0  | 20   | 0  | 20   |
|         | Coronavirus | 15  | 11  | 14  | 0   | 4   | 1   | 7   | 0   | 7   | 11  | 2  | 0  | 0  | 14  | 0  | 20   | 0  | 20   |
|         | SARS-CoV-2  | 2   | 8   | 7   | 1   | 3   | 2   | 1   | 1   | 7   | 7   | 0  | 0  | 0  | 15  | 0  | 20   | 0  | 20   |
|         | total       | 17  | 32  | 28  | 8   | 15  | 4   | 8   | 3   | 22  | 25  | 4  | 0  | 0  | 40  | 0  | 60   | 0  | 60   |
| Italy   | COVID-19    | 0   | 1   | 1   | 1   | 1   | 1   | 0   | 2   | 8   | 5   | 0  | 1  | 0  | 11  | 0  | 20   | 0  | 20   |
|         | Coronavirus | 0   | 3   | 1   | 1   | 3   | 1   | 1   | 2   | 10  | 10  | 3  | 2  | 0  | 7   | 0  | 20   | 0  | 20   |
|         | SARS-CoV-2  | 0   | 8   | 4   | 2   | 7   | 3   | 6   | 8   | 7   | 2   | 0  | 0  | 0  | 7   | 5  | 20   | 0  | 20   |
|         | total       | 0   | 12  | 6   | 4   | 11  | 5   | 7   | 12  | 25  | 17  | 3  | 3  | 0  | 25  | 5  | 60   | 0  | 60   |
| France  | COVID-19    | 0   | 3   | 3   | 0   | 2   | 0   | 0   | 2   | 5   | 7   | 6  | 1  | 0  | 9   | 0  | 20   | 0  | 20   |
|         | Coronavirus | 1   | 4   | 5   | 0   | 3   | 2   | 0   | 6   | 8   | 7   | 2  | 2  | 0  | 11  | 0  | 20   | 0  | 20   |
|         | SARS-CoV-2  | 1   | 5   | 5   | 1   | 6   | 4   | 2   | 3   | 9   | 3   | 0  | 0  | 0  | 6   | 0  | 20   | 0  | 20   |
|         | total       | 2   | 12  | 13  | 1   | 11  | 6   | 2   | 11  | 22  | 17  | 8  | 3  | 0  | 26  | 0  | 60   | 0  | 60   |
| TOTAL N |             | 61  | 139 | 128 | 61  | 126 | 67  | 62  | 71  | 174 | 167 | 18 | 14 | 1  | 256 | 14 | 531  | 0  | 532  |
| TOTAL % |             | 11% | 26% | 24% | 11% | 24% | 13% | 12% | 13% | 33% | 31% | 3% | 3% | 0% | 48% | 3% | 100% | 0% | 100% |

<sup>a</sup> Webpage contained suspicious information indicating a fraudulent attempt, quote "(...) The Recording Academy® and its affiliated charitable foundation MusiCares® have established a COVID-19 Relief Fund to help our peers in the music community affected by the Coronavirus pandemic."; source: <https://www.grammy.com/musicares/get-help/musicares-coronavirus-relief-fund>

<sup>b</sup>Values indicate the number of webpages in each SERP.
