# Supplementary material for: Online Information of COVID-19: Visibility and Characterization of Highest Positioned Websites by Google between March and April 2020—A Cross-Country Analysis
Source: MDPI journal article supplement (doi:10.3390/ijerph19031491), 2022-01-28
Supplement: s1 [file s1]

**Table S2.** Types of information about COVID-19 returned by Google using the "fake news" keyword, by country (n = 153)

|           |           | Fake news on: |                                |                                   |                                   |                            |                   |                |           |                     |                                                                          |                                                            | Was fake news explained |         |                                                          |                                                                   |                                   |                                |                                                           |                                    |     |     |                  |            |                 |
|-----------|-----------|---------------|--------------------------------|-----------------------------------|-----------------------------------|----------------------------|-------------------|----------------|-----------|---------------------|--------------------------------------------------------------------------|------------------------------------------------------------|-------------------------|---------|----------------------------------------------------------|-------------------------------------------------------------------|-----------------------------------|--------------------------------|-----------------------------------------------------------|------------------------------------|-----|-----|------------------|------------|-----------------|
|           |           | Quarantine    | Symptoms of disease /infection | Disease or infection risk factors | Disease or infection consequences | Ways of virus transmission | Incubation period | Carrying virus | Treatment | Preventive measures | Alternative/complementary medicine (unconventional methods of treatment) | Stance toward complementary and alternative medicine (CAM) |                         |         | Epidemiological data (number of infections, deaths etc.) | Whether the page contained a testimonial (e.g., a personal story) | Whether a celebrity was mentioned | Whether religion was mentioned | Other, ex. regulations during pandemic, services, economy | Information about online fake news |     |     |                  |            |                 |
|           |           |               |                                |                                   |                                   |                            |                   |                |           |                     |                                                                          |                                                            | positive                | neutral | negative                                                 |                                                                   |                                   |                                |                                                           |                                    | Yes | No  | Not applicable   | TOTAL SERP |                 |
| Country   | Keyword   |               |                                |                                   |                                   |                            |                   |                |           |                     |                                                                          |                                                            |                         |         |                                                          |                                                                   |                                   |                                |                                                           |                                    |     |     |                  |            |                 |
| Spain     | Fake news | 0             | 0                              | 0                                 | 0                                 | 0                          | 1                 | 0              | 0         | 1                   |                                                                          | 0                                                          | 0                       | 0       | 0                                                        | 0                                                                 | 0                                 | 0                              | 0                                                         | 11                                 | 16  | 12  | 0                | 3          | 16 <sup>d</sup> |
| Singapore | Fake news | 0             | 1                              | 3                                 | 1                                 | 5                          | 0                 | 0              | 5         | 5                   |                                                                          | 1                                                          | 3                       | 0       | 0                                                        | 5                                                                 | 2                                 | 2                              | 0                                                         | 16                                 | 20  | 14  | 0                | 6          | 20 <sup>e</sup> |
| USA       | Fake news | 1             | 1                              | 3                                 | 2                                 | 3                          | 0                 | 2              | 1         | 1                   |                                                                          | 2                                                          | 1                       | 0       | 0                                                        | 3                                                                 | 0                                 | 1                              | 0                                                         | 12                                 | 14  | 14  | 0                | 0          | 14 <sup>f</sup> |
| Australia | Fake news | 0             | 0                              | 5                                 | 2                                 | 1                          | 0                 | 4              | 1         | 9                   |                                                                          | 0                                                          | 0                       | 0       | 0                                                        | 1                                                                 | 0                                 | 2                              | 1                                                         | 2                                  | 18  | 19  | 1 <sup>a</sup>   | 0          | 20              |
| Poland    | Fake news | 1             | 0                              | 0                                 | 0                                 | 3                          | 0                 | 1              | 1         | 6                   |                                                                          | 2                                                          | 0                       | 0       | 2                                                        | 1                                                                 | 0                                 | 0                              | 0                                                         | 1                                  | 12  | 10  | 0                | 3          | 13 <sup>g</sup> |
| UK        | Fake news | 0             | 0                              | 2                                 | 0                                 | 3                          | 0                 | 0              | 3         | 1                   |                                                                          | 2                                                          | 1                       | 0       | 0                                                        | 0                                                                 | 0                                 | 1                              | 0                                                         | 0                                  | 10  | 10  | 0                | 0          | 10              |
| Germany   | Fake news | 0             | 0                              | 7                                 | 1                                 | 0                          | 0                 | 0              | 5         | 10                  |                                                                          | 2                                                          | 0                       | 0       | 0                                                        | 1                                                                 | 0                                 | 2                              | 2                                                         | 7                                  | 20  | 20  | 0                | 0          | 20              |
| Italy     | Fake news | 0             | 0                              | 3                                 | 5                                 | 3                          | 0                 | 0              | 8         | 11                  |                                                                          | 0                                                          | 0                       | 0       | 0                                                        | 0                                                                 | 0                                 | 0                              | 0                                                         | 5                                  | 20  | 18  | 2 <sup>b,c</sup> | 0          | 20              |
| France    | Fake news | 0             | 0                              | 0                                 | 0                                 | 2                          | 1                 | 1              | 1         | 9                   |                                                                          | 0                                                          | 0                       | 0       | 0                                                        | 0                                                                 | 0                                 | 5                              | 0                                                         | 2                                  | 20  | 20  | 0                | 0          | 20              |
| TOTAL N   |           | 2             | 2                              | 23                                | 11                                | 20                         | 2                 | 8              | 25        | 53                  |                                                                          | 9                                                          | 5                       | 0       | 2                                                        | 11                                                                | 2                                 | 13                             | 3                                                         | 56                                 | 150 | 137 | 3                | 12         | 153             |
| TOTAL %   |           | 1%            | 1%                             | 15%                               | 7%                                | 13%                        | 1%                | 5%             | 16%       | 35%                 |                                                                          | 6%                                                         | 3%                      | 0%      | 1%                                                       | 7%                                                                | 1%                                | 8%                             | 2%                                                        | 37%                                | 98% | 90% | 2%               | 8%         | 100%            |

a. The article denied information about a government official who reportedly went to a hospital with a suspected infection. Rather, he was quarantined on an island. <https://www.thebigsmoke.com.au/author/fake-news/>

b. The article presented a new WhatsApp policy, [https://www.tgcom24.mediaset.it/tgtech/fake-news-sul-coronavirus-whatsapp-limita-le-catene\\_17028242-202002a.shtml](https://www.tgcom24.mediaset.it/tgtech/fake-news-sul-coronavirus-whatsapp-limita-le-catene_17028242-202002a.shtml)

c. The article about readers' attitudes, scientific activities, statements of politicians [https://www.tgcom24.mediaset.it/tgtech/fake-news-sul-coronavirus-whatsapp-limita-le-catene\\_17028242-202002a.shtml](https://www.tgcom24.mediaset.it/tgtech/fake-news-sul-coronavirus-whatsapp-limita-le-catene_17028242-202002a.shtml)

d. Other SERPs did not refer to the pandemic. Out of 16 SERPs, three were neutral, ex. "Coronavirus: How can you stop the spread of misinformation?". In one case the authors had doubts whether the fake news was explained: [https://www.elplural.com/politica/espana/vox-abona-bulos-denuncia-fake-news-medios\\_236979102](https://www.elplural.com/politica/espana/vox-abona-bulos-denuncia-fake-news-medios_236979102)

e. Out of 20 SERPs, six were neutral, ex. "A collection of 400 scientists have joined together to form Indian Scientists' Response to COVID-19 – committed to debunking false information about the virus.", "Facebook, Twitter, and YouTube have each moved quickly to remove coronavirus misinformation that encourages people to take actions that could put them at risk (...). "

f. Other SERPs did not refer to the pandemic. Last 3 SERPs referred to Africa, India and Ecuador

g. Out of 13 SERPs, three were neutral ex. "how to read online information and detect fake news"

h. Values indicate the number of webpages in each SERP mentioning a topic.
